# Supplementary material for: Inhibitory Effects of Azelnidipine Tablets on Morning Hypertension
Source: Springer Nature journal article supplement (doi:10.1007/s40268-013-0006-8), 2013-03-01
Supplement: MOESM1 [file 24125628]

*Drugs in R&D*

## **Inhibitory Effects of Azelnidipine Tablets on Morning Hypertension**

Kazuomi Kario, Yuki Sato, Masayuki Shirayama, Megumi Takahashi,  
Kazuhiro Shiosakai, Katsutoshi Hiramatsu, Masahiro Komiya, Kazuyuki Shimada

**Corresponding Author:** Dr. Kazuomi Kario, Division of Cardiovascular Medicine,  
Department of Medicine, Jichi Medical University School of Medicine,  
3311-1 Yakushiji, Shimotsuke, Tochigi 329-0498, Japan.  
e-mail: [kkario@jichi.ac.jp](mailto:kkario@jichi.ac.jp)

---

**Electronic Supplementary Material**

## A List of Participating Centers (in Japanese)

### 北海道

J A北海道厚生連旭川厚生病院、あだち内科クリニック、かどの内科消化器科、そとぞの内科医院、つぎたてクリニック、ふじかね内科医院、医療法人回生会大西病院、医療法人溪仁会手稲溪仁会クリニック、医療法人五紀会室蘭太平洋病院、医療法人社団だい内科医院、医療法人社団ひろ内科循環器科クリニック、医療法人社団やなづめ内科医院、医療法人社団愛心館愛心循環器クリニック、医療法人社団横田循環器科内科医院、医療法人社団吉田内科医院、医療法人社団協立消化器循環器病院、医療法人社団慶友会吉田病院、医療法人社団敬愛会本多医院、医療法人社団江和会おくの内科胃腸科クリニック、医療法人社団司馬内科クリニック、医療法人社団青沼医院、医療法人社団大正クリニック、医療法人社団竹嶋内科クリニック、医療法人社団藤田クリニック、医療法人社団内科高橋清仁クリニック、医療法人社団木村内科小児科医院、医療法人社団野村内科クリニック、医療法人社団矢嶋内科、医療法人社団柳川内科医院、医療法人社団有秀会旭川神居内科医院、医療法人社団煌生会上ところ診療所、医療法人日之出内科クリニック、医療法人社団和仁会平田内科クリニック、横田胃腸科内科クリニック、音威子府村立診療所、宮の沢内科・循環器科クリニック、釧路循環器呼吸器クリニック、坂口内科クリニック、深川市立病院、青木内科クリニック、増毛町立市街診療所、村上内科小児科医院、地方職員共済組合北海道支部道庁診療所、特別医療法人秀眸会大塚眼科病院、白老町立国民健康保険病院

### 青森県

てらだクリニック、みやしげ内科クリニック、むらもと内科消化器科クリニック、医療法人康和会河原木内科医院、医療法人七徳会たかはし内科胃腸科小児科、医療法人芳龍会千田医院、医療法人芳和会阿部クリニック、加藤内科循環器科、公立七戸病院、財団法人シルバーリハビリテーション協会シルバー病院、山口胃腸クリニック、福土胃腸科循環器科医院

### 岩手県

いとう脳神経内科、いわぶち脳神経クリニック、うらべ内科クリニック、おしかわ内科クリニック、医療法人とみた脳神経外科耳鼻咽喉科医院、医療法人楽山会せいてつ記念病院、医療法人共生会松園第二病院、医療法人敬星会二宮内科クリニック、医療法人菜園循環器内科医院、医療法人桜心会おりそ内科循環器クリニック、医療法人社団真心会佐々木内科小児科医院、医療法人和心会鈴木内科医院、佐藤雅夫クリニック、財団法人総合花巻病院、神林医院、川守田医院、中館内科クリニック、木村内科クリニック

## 宮城県

はんざわ内科胃腸科、ゆうファミリークリニック、医療法人華月会村岡外科クリニック、医療法人高橋消化器内科、医療法人社団敬愛会佐々木内科医院、医療法人社団仙石病院、医療法人社団龍仁会萩野診療所、医療法人社団櫻井内科医院、医療法人社団齋藤外科齋藤外科クリニック、医療法人石巻中央きし内科クリニック、医療法人台原内科クリニック、柿沼循環器科、丸森町国民健康保険丸森病院、公立刈田総合病院、国家公務員共済組合連合会東北公済病院、佐々木医院、財団法人宮城厚生協会くりこまクリニック、財団法人宮城厚生協会長町病院、財団法人光ヶ丘スペルマン病院、三浦病院、社団法人全国社会保険協会連合会東北厚生年金病院、小林内科医院、松尾けんこうクリニック、大久保医院

## 秋田県

J A秋田厚生連仙北組合総合病院、いとう内科医院、医療法人あかつき会菅原内科クリニック、医療法人関医院、医療法人秋田医仁会秋田メモリアルクリニック、医療法人翠松会木曾医院、医療法人中島内科医院、横手市立大森病院、公立米内沢総合病院、国立大学法人秋田大学医学部附属病院、今村内科循環器科医院、秋田県厚生農業協同組合連合会秋田組合総合病院、小玉医院、村山クリニック、渡辺内科循環器科医院

## 山形県

医療法人篠田好生会篠田総合病院、医療法人社団こくの医院、公立高島病院、財団法人三友堂病院、山形県立新庄病院、社会福祉法人恩賜財団済生会山形済生病院、大辻外科胃腸科、地方独立行政法人山形県・酒田市病院機構日本海総合病院、置賜広域病院組合公立置賜総合病院、北村山公立病院

## 福島県

あべ内科医院、いしわたクリニック、ささき内科クリニック、医療法人やまさわ内科、医療法人遠山会遠山胃腸科内科医院、医療法人掛田中央内科、医療法人社団大志会矢吹医院、医療法人常磐会いわき湯本病院、医療法人辰星会柊病院、君島内科消化器科クリニック、財団法人脳神経疾患研究所附属南東北医療クリニック、山田内科クリニック、志賀内科クリニック、社会福祉法人恩賜財団済生会福島総合病院、社団医療法人養生会かしま病院、米村胃腸科内科医院

## 茨城県

ひかりクリニック、やまき内科クリニック、医療法人あいん会あいん常澄医院、医療法人くらのクリニック、医療法人さくら会さくらクリニック、医療法人関内科医院、医療法人健伸会会沢内科クリニック、医療法人恒貴会協和中央病院、医療法人江東会存身堂病院、医療法人社団功秀会亀山医院、医療法人社団寿星会石岡診療所、医療法人社団新井内科医院、医療法人社団尽誠会さくら内科クリニック、医療法人社団双愛会つくば双愛病院、医療法人社団豊済会ときわクリニック、医療法人社団高安内科循環器科クリニック、医療法人筑峰会飯田医院、山村医院、社会福祉法人恩賜財団済生会神栖済生会病院、小倉医院、

松永内科クリニック、東京医科大学霞ヶ浦病院、林田医院

## 栃木県

おぬき内科クリニック、医療法人安西・古谷クリニック、医療法人紫苑会阿久津医院今市分院、医療法人社団広揚会腰塚医院、医療法人西内科医院、医療法人坦行会角田内科医院、公生会小林内科、佐野市民病院、社会福祉法人全国重症心身障害児(者)を守る会あしかがの森足利病院、西の宮岩倉循環器内科、栃木県済生会宇都宮病院、日本赤十字社栃木県支部足利赤十字病院、武田内科クリニック

## 群馬県

医療法人寺田内科小児科医院、医療法人松田会小幡医院、医療法人澄観矢部クリニック、医療法人大澤医院、医療法人鶴谷会鶴谷病院、医療法人北関東循環器病院、医療法人悠仁会星野クリニック、永山医院、下仁田南牧医療事務組合下仁田厚生病院、桐生地域医療組合桐生厚生総合病院、金丸内科医院、国立大学法人群馬大学医学部附属病院、社団法人伊勢崎佐波医師会病院、神流町万場診療所、多野藤岡医療事務市町村組合公立藤岡総合病院、塚越クリニック

## 埼玉県

けやき台どんぐりクリニック、マンモエクスサ菅又クリニック、みやた内科クリニック、やまかわ内科クリニック、ゆきさだクリニック、安富医院、医療法人せいわ会松谷内科医院、医療法人岡田医院、医療法人久恩会下条医院、医療法人社団薫風会坂戸内科医院、医療法人光隼会富安医院、医療法人光友会木村医院、医療法人慈秀会上尾アーバンクリニック、医療法人治水会斎藤クリニック、医療法人社団ゆうゆう会みなみ草加クリニック、医療法人社団医鳳会春野クリニック、医療法人社団嬉泉会春日部嬉泉病院、医療法人社団健優会柴野医院、医療法人社団三友会彩のクリニック、医療法人社団仁心内科クリニック、医療法人社団清心会至聖病院、医療法人社団創友会丸山クリニック、医療法人社団邦正会けやき内科、医療法人社団明衣会天野医院、医療法人社団和彩会杉本内科クリニック、医療法人新井病院、医療法人新紀会高津江南クリニック、医療法人新正会間柴医院、医療法人真誠会本間医院、医療法人成和会叶澤医院、医療法人相羽医院、医療法人増田外科医院、医療法人大澤会大澤医院、医療法人田中内科小児科医院、医療法人藤正会ユニットワン外科クリニック、医療法人柏朋会岩崎医院、医療法人悠仁会新田クリニック、学校法人北里研究所北里大学北里研究所メディカルセンター病院、原内科眼科医院、高田医院、三光町クリニック、松澤クリニック、深田クリニック、生々堂新座西山内科・眼科クリニック、石井医院、石井内科医院、田中医院、徳竹医院、飯島医院

## 千葉県

きららのくにみどりが丘クリニック、ゲートウェイクリニックおゆみ野中央、とちき内科循環器科、ほり医院、医療法人三紫会小田病院、医療法人社団馨仁会妙典内科クリニック、医療法人社団恒心会遠藤クリニック、医療法人社団今村医院、医療法人社団三愛会君塚病院、医療法人社団慈協会市原メディカルキュア、医療法人社団若菜会皆川医院、医療法人社団春鈴会寺田クリニック、医療法人社団松石会松石内科医院、医療法人社団成亮会津田医院、医療法人社団誠馨会新東京病院、医療法人社団総和会武村内科医院、医療法人社団村井クリニック、医療法人社団大槻医院、医療法人社団桃和会門倉医院、医療法人社団徳友会白旗整形外科内科、医療法人社団保健会谷津保健病院、医療法人社団煌和会國分クリニック、医療法人社団松和会望星姉崎クリニック、医療法人鉄蕉会亀田総合病院、関谷医院、古川医院、国保直営総合病院君津中央病院、三矢小台内科クリニック、小川内科、大柏内科クリニック、中田内科医院、土居内科医院、東邦二和クリニック、日本医科大学千葉北総病院、白井由井内科、平安堂内科、茂田医院

## 東京都

N T T 東日本関東病院、くどうちあき脳神経外科クリニック、クリニックヨコヤマ、こがクリニック、こくぶん医院、ふるたに医院、まつむら胃腸科、杏林大学医学部附属病院、伊藤クリニック、医療法人健隆会石橋医院、医療法人財団荻窪病院、医療法人財団朔望会常盤台外科病院、医療法人社団あすか会並木クリニック、医療法人社団かとうクリニック、医療法人社団めぐみ会田村クリニック、医療法人社団レニア会武谷ピノロピ記念きよせの森総合病院、医療法人社団久保田医院、医療法人社団近藤医院、医療法人社団慶心会土屋クリニック、医療法人社団敬松会石田医院、医療法人社団健成会小林内科クリニック、医療法人社団健立会倉井内科医院、医療法人社団好仁会滝山病院、医療法人社団三秀会三宅クリニック、特定医療法人社団慈敬会府中医王病院、医療法人社団慈幸会安井医院、医療法人社団慈正会天沼医院、医療法人社団慈徳会隅田川診療所、医療法人社団周生会杉田クリニック、医療法人淳風会渡内科・胃腸科、医療法人社団小野内科診療所、医療法人社団祥宏会鈴木医院、医療法人社団仁泉会としま昭和病院附属クリニック、医療法人社団翠会成増厚生病院、医療法人社団正有会高橋医院、医療法人社団生生会生生医院、医療法人社団誠和会白鬚橋病院、医療法人社団青葉会一橋病院、医療法人社団泰心会内科小児科淵上医院、医療法人社団仲谷クリニック、医療法人社団東光会西東京中央総合病院、医療法人社団南原内科クリニック、医療法人社団白水会須田クリニック、医療法人社団片山内科、医療法人社団明芳会イムス記念病院、医療法人社団涼友会執行クリニック、医療法人社団和平会坪井医院、医療法人社団翔明会しのめ内科クリニック、羽山医院、永井クリニック、宮入内科、金田医院、公立福生病院、厚生医院、国家公務員共済組合連合会虎の門病院、国立国際医療センター戸山病院、国立大学法人東京大学医学部附属病院、今福医院、財団法人厚生年金事業振興団東京厚生年金病院、財団法人自警会西東京警察病院、財団法人聖路加国際病院、財団法人日本心臓血圧研究振興会附属榊原記念病院、三原内科循環器科クリニック、社会福祉法人多摩済生医療団多摩済生病院、社会保険中央総合病院、駿河台日本大学病院、順天堂大学医学部附属順天堂医院、順天堂大学医学部附属順天堂東京江

東高齢者医療センター、昭和大学病院、昭和大学病院附属東病院、上池上診療所、城北診療所、菅沢医院、瀬川医院、青梅市立総合病院、石神井診療所、浅川医院、大林内科医院、竹内内科小児科医院、中川医院、天野医院、田中医院、田幡医院、東海大学医学部附属八王子病院、東京医科歯科大学大学院、東京医科大学八王子医療センター、東京警察病院、東京都立駒込病院、東京都立府中病院、東邦大学医療センター大橋病院、東邦大学医療センター大森病院、日本医科大学、日本医科大学多摩永山病院、日本赤十字社医療センター、日本赤十字社東京都支部武蔵野赤十字病院、日本大学医学部附属練馬光が丘病院、日本大学医学部附属板橋病院、日野市立病院、梅沢医院、並木医院、北千束整形外科、練馬総合病院

## 神奈川県

いわま内科クリニック、おちあい内科循環器科、かわくぼ内科循環器科、くまい内科医院、まごころ内科整形外科クリニック、医療法人やぐち内科クリニック、医療法人やまがみ内科やまがみ内科医院、医療法人愛仁会太田総合病院、医療法人山内龍馬財団山内病院、医療法人社団アイメディケア磯田内科、医療法人社団おやま内科クリニック、医療法人社団きらり細田クリニック、医療法人社団永樹会上菅田医院、医療法人社団宮下クリニック、医療法人社団孝仁会平井クリニック、医療法人社団康心会湘南東部クリニック、医療法人社団志摩医院、医療法人社団杉山会杉山医院、医療法人社団浅木クリニック、医療法人社団善人会アリスクリニック、医療法人社団朝日会朝日内科クリニック、医療法人社団土屋医院、医療法人社団柏綾会綾瀬厚生病院、医療法人社団螢田診療所、医療法人小林病院、医療法人湘南鶴沼内科・リウマチ科安達正則クリニック、医療法人平園クリニック、医療法人本郷クリニック、医療法人養光会ベイサイドクリニック、横浜市立みなと赤十字病院、恩賜財団済生会横浜市南部病院、公立大学法人横浜市立大学附属市民総合医療センター、公立大学法人横浜市立大学附属病院、綱島泌尿器科・内科クリニック、高野クリニック、山川医院、社会福祉法人聖隷福祉事業団聖隷横浜病院、緒方医院、小杉クリニック、尻手クリニック、神奈川県立循環器呼吸器病センター、秦野北クリニック、川崎市立井田病院、相沢医院、大迫内科クリニック、中村医院、帝京大学医学部附属溝口病院、東海大学医学部附属大磯病院、藤沢市民病院、藤本内科クリニック、特定医療法人社団育成社佐々木病院、富士フィルムグループ健康保険組合富士フィルム健康管理センター、野中脳神経外科クリニック

## 新潟県

うえの内科・外科クリニック、きしもと医院、はやつクリニック内科呼吸器科、医療法人さとう内科クリニック、医療法人社団研鑽会米倉医院、医療法人社団恒心会えきまクリニック内科はやし医院、医療法人社団高野内科循環器科クリニック、医療法人社団山口医院、医療法人社団水野内科クリニック、医療法人社団杉本医院、医療法人社団中山医院、医療法人社団片桐医院、医療法人社団本町クリニック、特定医療法人社団仁和会聖園病院、小林医院、小林医院、新潟県厚生農業協同組合連合会佐渡総合病院、新潟県厚生農業協同組合連合会村上総合病院、新潟県立吉田病院、新潟県立坂町病院、新潟大学医歯学総合

病院、川端内科消化器科医院、樋口医院

## 富山県

いき内科クリニック、医療法人社団柴田内科クリニック、医療法人真生会真生会富山病院、吉山医院、富山県厚生農業協同組合連合会高岡病院、富山県済生会富山病院

## 石川県

ナガサト太陽クリニック、安原医院、医療法人社団安田医院、医療法人社団浅ノ川金沢循環器病院、医療法人社団定梶医院、医療法人社団北野内科クリニック、医療法人社団松沼医院、稲坂内科医院、金沢市立病院、金沢社会保険病院、公立松任石川中央病院、石川県済生会金沢病院、石川県立中央病院、独立行政法人国立病院機構金沢医療センター

## 福井県

医療法人さくら千寿会さくら千寿クリニック、医療法人明峰会木村病院、向坂内科医院、舟橋内科クリニック、西武クリニック、特定医療法人千寿会つくし野病院、福井社会保険病院、福井大学医学部附属病院

## 山梨県

クリニック小林、医療法人財団加納岩加納岩総合病院、医療法人社団高原会高原病院、医療法人徳生会松山クリニック、黒田医院、東甲府医院

## 長野県

安曇野赤十字病院、医療法人あおば会佐藤医院、医療法人い内科クリニック、医療法人山月会小諸病院、医療法人新緑会中村医院、医療法人村山内科医院、医療法人保健同人会田中病院、国立大学法人信州大学医学部附属病院、松岡内科医院、塔の原内川医院、東御市民病院、藤が丘内科、鵜沢内科クリニック

## 岐阜県

おおくま内科クリニック、おぜきクリニック、かさい内科小児科皮ふ科、医療法人梶の木会梶の木内科医院、医療法人社団慈朋会澤田病院、医療法人社団誠広会岐阜中央病院、医療法人社団友愛会岩砂病院第一、河合内科医院、岐阜県厚生農業協同組合連合会西美濃厚生病院、岐阜県厚生農業協同組合連合会中濃厚生病院、岐阜県総合医療センター、岐阜市民病院、篠田医院、美濃市立美濃病院、不破医院、野村クリニック

## 静岡県

医療法人社団ヴェリタス静岡曲金クリニック、医療法人社団オカニューロケアクリニック  
岡クリニック、医療法人社団とよだとよだクリニック、医療法人社団医心会せのお内科消  
化器科、医療法人社団健新会池田クリニック、医療法人社団宏仁会浅羽医院、医療法人社  
団幸徳会薬袋内科クリニック、医療法人社団桜愛会高木医院、医療法人社団志都呂高橋内  
科医院、医療法人社団駿越会岡島内科医院、医療法人社団焼津上村内科、医療法人社団清  
秀会滝戸医院、医療法人社団静浜会横山消化器内科、医療法人泰陽会近藤医院、榎本内科  
クリニック、関外科胃腸科医院、県西部浜松医療センター、高橋内科医院、国際医療福祉  
大学熱海病院、財団法人芙蓉協会聖隷沼津病院、順天堂大学医学部附属静岡病院、小澤医  
院、入交医院、野村クリニック

## 愛知県

いまい内科クリニック、おぎ原内科クリニック、かわいクリニック、すずきクリニック、  
安保クリニック、伊藤医院、医療法人永好会加賀医院、医療法人加藤医院、医療法人加藤  
医院、医療法人貴優会高橋ファミリークリニック、医療法人宮田医院、医療法人幸会クリ  
ニックおかだ、医療法人恒仁会恒吉クリニック、医療法人佐藤是医院、医療法人社団フロ  
ムファースト竹田内科胃腸科クリニック、医療法人親理会中町クリニック、医療法人知邑  
舎岩倉病院、医療法人美月会前後整形外科クリニック、医療法人野村内科、岩田内科、宮  
島クリニック、山田医院、山本医院、小山医院、植村循環器科内科、森内科クリニック、  
茶谷内科皮フ科、田中クリニック、田島クリニック、東脇胃腸科外科、独立行政法人国立  
病院機構豊橋医療センター、独立行政法人労働者健康福祉機構中部労災病院、内科小児科  
小石川医院、百瀬クリニック、末沢医院、名古屋大学医学部附属病院、木下医院

## 三重県

医療法人井上医院、医療法人斎寿会鈴鹿回生病院、菰野厚生病院、国立大学法人三重大学  
医学部附属病院、山田赤十字病院、山本クリニック、市立四日市病院、尾鷲総合病院

## 滋賀県

うちだクリニック、医療法人マキノ病院、医療法人九谷医院、医療法人寺井医院、医療法  
人社団雨森医院、近江八幡市立総合医療センター、源内クリニック、公立甲賀病院組合公  
立甲賀病院、国立大学法人滋賀医科大学医学部附属病院、財団法人豊郷病院、社会福祉法  
人恩賜財団済生会滋賀県病院、社会保険滋賀病院

## 京都府

かきた内科医院、わたなベクリニック、医療法人医仁会武田総合病院、医療法人吉森内科  
医院、医療法人財団康生会東山武田病院、医療法人財団康生会武田病院、医療法人坂部医  
院、医療法人坂本医院、医療法人相馬病院、関西医科大学附属男山病院、京都ルネス病院、  
京都大学医学部附属病院、公立大学法人京都府立医科大学附属病院、社会福祉法人宇治病  
院、西垣内科医院、西村医院、大林内科・循環器科クリニック、沢井内科医院、明治国際



医療大学附属病院、林医院

## 大阪府

イッセイ内科クリニック、ともだクリニック、はまぐち内科クリニック、医療法人タツミ医院、医療法人ヒューマンライツ健康協会ツルミ診療所、医療法人ゆうあい会宮岡クリニック、医療法人愛心会今井クリニック、医療法人梶川医院、医療法人貴島会貴島病院本院、医療法人宮高医院、医療法人橋村医院、医療法人錦秀会阪和第二泉北病院、医療法人幸信会おおしか医院、医療法人今村医院、医療法人三寿会御崎クリニック、医療法人社団丸山会八戸の里病院、医療法人春生会北村外科内科クリニック、医療法人小川医院、医療法人昭仁会小川外科、医療法人森山外科胃腸科医院、医療法人真輝会浅田クリニック、医療法人仁寿会高槻南仁寿会診療所、医療法人翠明会千里山病院、医療法人成山医院、医療法人生野内科クリニック、医療法人聖心会清水クリニック、医療法人川下内科循環器科、医療法人泉野医院、医療法人荘野医院、医療法人大江内科、医療法人大鵬会千本病院、医療法人中尾内科クリニック、医療法人長谷川クリニック、医療法人渡辺医学会桜橋渡辺病院、医療法人福寿会阿倍野診療所、医療法人福肇会福西内科診療所、医療法人豊成会豊中脳神経外科クリニック、医療法人靖英会玉井クリニック、稲葉医院、益田クリニック、関西電力病院、京阪電気鉄道枚方診療所、近江内科、近山医院、古野診療所、高槻赤十字病院、高島クリニック、国家公務員共済組合連合会枚方公済病院、黒川医院、財団法人船員保険会大阪船員保険病院、財団法人田附興風会医学研究所北野病院、坂口医院、坂中内科クリニック、阪本蒼生会蒼生病院、山本内科、市田内科クリニック、市立吹田市民病院、市立池田病院、社会福祉法人恩賜財団済生会大阪府済生会野江病院、社会福祉法人四天王寺福祉事業団四天王寺病院、循環器科・内科不藤医院、小笠原医院、西田クリニック、増田内科医院、村上医院、村木クリニック、大黒医院、大阪回生病院、大阪厚生年金病院、大阪市立総合医療センター、大阪赤十字病院、大阪掖済会病院、中谷医院、朝川内科クリニック、長野医院、田中内科、陶山医院、特定医療法人きつこう会多根総合病院、特定医療法人景岳会南大阪病院、特定医療法人大道会森之宮病院、特別・特定医療法人愛仁会千船病院、能勢クリニック、梅沢医院、淀川キリスト教病院

## 兵庫県

いわおかクリニック、きしの内科医院、くさか医院、しもながたクリニック、つだ内科クリニック、はぎの内科クリニック、医療法人はせがわ内科、医療法人高嶋内科、医療法人社団坂本医院、医療法人社団おりたクリニック、医療法人社団だいたう循環器クリニック、医療法人社団三木医院、医療法人社団山内医院、医療法人社団森迫脳神経外科、医療法人社団神鋼会神鋼病院、医療法人社団翠和会天野内科クリニック、医療法人社団泰志会島田クリニック、医療法人社団竹内内科、医療法人社団辻井はやし内科、医療法人社団渡辺クリニック、医療法人社団日下医院、医療法人社団懿徳会田中医院、医療法人松藤会入江病院、医療法人社団真心会井上クリニック、医療法人中山内科リウマチ・アレルギー科、医療法人野澤内科循環器科、医療法人有晃会ふなもとクリニック、岡野医院、公立豊岡病院日高医療センター、財団法人神戸市地域医療振興財団西神戸医療センター、山下診療所、

市立川西病院、社団法人日本海員掖済会神戸掖済会病院、神戸市立医療センター西市民病院、須田内科循環器科、杉田クリニック、西宮市立中央病院、西山医院、西脇市立西脇病院、前橋内科循環器科医院、早稲田内科、大橋医院、朝山内科医院、藤原内科クリニック、藤野内科クリニック、特定医療法人誠仁会大久保病院、独立行政法人労働者健康福祉機構神戸労災病院、内科循環器科米田クリニック、繁田医院、福井クリニック、宝塚市立病院、北垣クリニック、明石市立市民病院、木下内科クリニック、林医院、澤田医院

## 奈良県

かきざきクリニック、クリニックせんざい、まつたハートクリニック、医療法人気象会東朋香芝病院、医療法人康成会星和台クリニック、医療法人和田クリニック、医療法人澤田医院、公立大学法人奈良県立医科大学附属病院、奈良県立五條病院、福岡医院、牧浦内科

## 和歌山県

医療法人西浦内科クリニック、医療法人博信会串医院、医療法人明美会有田南病院、花野医院、海南市民病院、社会福祉法人恩賜財団済生会和歌山病院、小西内科医院、田辺市本宮さくら診療所、独立行政法人国立病院機構南和歌山医療センター、日本赤十字社和歌山医療センター

## 鳥取県

医療法人旗ヶ崎内科クリニック、医療法人社団越智内科医院、医療法人社団米本内科、医療法人社団林原医院、加藤医院、宍戸医院、鳥取医療生活協同組合鳥取生協病院

## 島根県

医療法人社団橘林堂川上医院、玉造厚生年金病院、社団法人益田市医師会立益田地域医療センター医師会病院、松江赤十字病院、独立行政法人国立病院機構松江病院、独立行政法人国立病院機構浜田医療センター

## 岡山県

医療法人イキイキ会水川内科小児科医院、医療法人ほそや医院、医療法人よしおか医院、医療法人功友会はっとり医院、医療法人慈恵会平井病院、医療法人社団清和会笠岡第一病院、医療法人社団渕本医院、医療法人俊医会藤田医院、医療法人雄風会あしもり内科クリニック、医療法人雄風会加茂川診療所、岡山済生会総合病院、鏡野町国民健康保険病院、国立大学法人岡山大学病院、川崎医科大学附属病院、総合病院岡山赤十字病院、独立行政法人国立病院機構岡山医療センター、白髪胃腸科内科小児科、福井医院

## 広島県

すずき内科胃腸科クリニック、とくも胃腸科皮ふ科、医療法人かわの医院、医療法人さつき会井上内科医院、医療法人せのがわよこがわ内科循環器科クリニック、医療法人たかまさ会山崎病院、医療法人岡本内科消化器科、医療法人敬愛会沖野医院、医療法人原田会原田内科医院、医療法人向田内科医院、医療法人社団恵仁会平岡内科医院、医療法人社団佐々木医院、医療法人社団大仁会大石病院、医療法人社団日本鋼管福山病院、医療法人社団木下クリニック、医療法人数佐内科胃腸科、医療法人中央内科クリニック、医療法人中丸クリニック、医療法人福原内科クリニック、医療法人緑樹会佐々木内科、広島県厚生農業協同組合連合会尾道総合病院、広島県厚生農業協同組合連合会広島総合病院、広島市立安佐市民病院、国家公務員共済組合連合会吉島病院、国立大学法人広島大学病院、三次市国民健康保険甲奴診療所、山東クリニック、川崎医院、独立行政法人国立病院機構広島西医療センター、内田クリニック、板阪内科小児科医院、板崎外科整形外科、濱田内科泌尿器科

## 山口県

おぐす内科・消化器科クリニック、医療法人わたぬきクリニック、医療法人社団小沢内科医院、岩国市立美和病院、済生会山口総合病院、山口県立総合医療センター、山陽小野田市民病院、小野田赤十字病院、医療法人社団同仁会周南記念病院、独立行政法人国立病院機構関門医療センター、独立行政法人国立病院機構岩国医療センター

## 徳島県

クリニック宙、医療法人おかがわ内科・小児科、医療法人松浦医院、医療法人辻泌尿器科内科クリニック、医療法人南医院、国立大学法人徳島大学病院、三代内科循環器科、徳島県厚生農業協同組合連合会阿南共栄病院、独立行政法人国立病院機構東徳島病院

## 香川県

医療法人社団マツオカ医院、医療法人社団英迎会そがわ医院、医療法人社団菅循環器科内科クリニック、医療法人社団里仁会瀬戸内クリニック、国立大学法人香川大学医学部附属病院、社会福祉法人恩賜財団済生会支部香川県済生会病院、秋山内科医院、渡辺ハートクリニック内科、独立行政法人国立病院機構高松医療センター、独立行政法人国立病院機構善通寺病院

## 愛媛県

医療法人たくま会福原内科医院、医療法人健生会循環器科林病院、医療法人厚仁会波方中央病院、医療法人浩悠会山本医院、医療法人菅井内科、医療法人博生会浜本内科、医療法人友朋会栗林病院、井石内科医院、鬼北町国民健康保険日吉診療所、金子循環器科内科、原循環器科内科クリニック、愛南町国民健康保険一本松病院、市立八幡浜総合病院、中川循環器科・内科 OSAS センター

## 高知県

医療法人白井会田野病院、医療法人協浜会浜田循環器内科、医療法人五月会須崎くろしお病院、医療法人須崎会高陵病院、医療法人防治会いずみの病院、医療法人防治会梅ノ辻クリニック、医療法人和光会木俵病院、国立大学法人高知大学医学部附属病院

## 福岡県

やまもと内科消化器科、医療法人UMC宇都宮内科医院、医療法人くまがえ内科医院、医療法人やぎゅうクリニック、医療法人原三信病院、医療法人弘医会福岡鳥飼病院、医療法人社団新日鐵八幡記念病院、医療法人聖峰会田主丸中央病院、医療法人小川医院、医療法人真愛会國崎 真クリニック、医療法人竹村医院、医療法人中村胃腸科医院、医療法人中田循環器科内科クリニック、医療法人中島こうやクリニック、医療法人天神会新古賀病院、医療法人日の里クリニック、医療法人日野内科医院、医療法人白十字会白十字病院、医療法人尾石内科消化器科医院、医療法人武井内科クリニック、医療法人文佑会原病院、医療法人堀之内胃腸科内科医院、久留米大学医学部附属医療センター、久留米大学病院、宮城脳神経外科クリニック、済生会福岡総合病院、産業医科大学病院、社会保険久留米第一病院、周田医院、村上循環器科・内科クリニック、大城診療所、中間市立病院、徳原クリニック、特定医療法人東筑病院、独立行政法人国立病院機構九州医療センター、畑間内科クリニック、板家医院、飯塚病院、福井医院、福岡県済生会二日市病院、福岡赤十字病院、福岡大学病院、矢田部内科循環器科医院

## 佐賀県

こが内科こどもクリニック、医療法人高橋内科、医療法人春陽会野口内科医院、社団法人全国社会保険協会連合会佐賀社会保険病院、上野内科医院

## 長崎県

まつもと内科麻酔科クリニック、医療法人健豆会えんどうファミリークリニック、医療法人山元内科、医療法人社団松添胃腸科外科総合診療クリニック、医療法人谷川医院、医療法人雄心会たかお循環器科内科医院、国立大学法人長崎大学医学部・歯学部附属病院、山下医院、松本医院、長崎市立市民病院、日本赤十字社長崎原爆病院

## 熊本県

みのだ内科循環器科、医療法人頭勝会まつえクリニック、医療法人社団松下会あけぼのクリニック、医療法人社団誠和会開病院、医療法人社団龍安安達内科胃腸科、医療法人深水医院、医療法人博済会島崎井上クリニック、宮崎内科胃腸科医院、社団法人全国社会保険協会連合会健康保険八代総合病院、清田循環器科内科医院、田辺外科・内科クリニック、独立行政法人国立病院機構熊本医療センター

## 大分県

医療法人医心会みえ記念病院、医療法人社団恵愛会大分中村病院、医療法人照臨会佐藤医院、医療法人中庸会宇佐胃腸病院、医療法人長門莫記念会長門記念病院、医療法人藤野循環器科内科医院、医療法人平田診療所、奥平医院、国東中央クリニック、社団法人大分市医師会立アルメイダ病院、大分赤十字病院、独立行政法人国立病院機構別府医療センター、堀循環器科内科クリニック

## 宮崎県

医療法人みぞくち医院、医療法人慶和会河野医院、医療法人社団救栄会若葉クリニック、宮崎県立延岡病院、国立大学法人宮崎大学医学部附属病院、社団法人全国社会保険協会連合会宮崎社会保険病院

## 鹿児島県

みどりクリニック、医療法人こころの陽こまき内科・循環器科クリニック、医療法人愛誠会昭南病院、医療法人一廣会福山内科、医療法人橋口医院、医療法人恵山会共立病院、医療法人広恵会益崎内科、医療法人清心会内科市来医院、医療法人青木医院、医療法人博萌会かのう医院、医療法人芳優たはら病院、川島医院、田中脳神経外科クリニック

## 沖縄県

かじまリゾートクリニック、医療法人クリニカ名護クリニック、医療法人賢信会当真ハートクリニック、医療法人紺碧会みなみしまクリニック、医療法人清成会浦西医院、医療法人泰山会まつしまクリニック、医療法人明陽会川根内科外科、医療法人友愛会豊見城中央病院、石川外科クリニック

(他、2施設)
